# Supplementary material for: Regulation of photodynamic interactions in 1,8-naphthalimide–linker–phenothiazine dyads by cyclodextrins
Source: Royal Society of Chemistry journal article supplement (doi:10.1039/c3cp54803a), 2014-01-01
Supplement: c3cp54803a.pdf [file c3cp54803a.pdf]

## Electronic Supplementary Information

### Regulation of Photodynamic Interactions in 1,8-Naphthalimide-linker-Phenothiazine Dyads by Cyclodextrins

Dae Won Cho,<sup>\*a</sup> Mamoru Fujitsuka,<sup>b</sup> Akira Sugimoto,<sup>b</sup> Ung Chan Yoon,<sup>c</sup> Dae Won Cho,<sup>d</sup> and Tetsuro Majima<sup>\*b</sup>

<sup>a</sup> Department of Advanced Materials Chemistry, Korea University (Sejong Campus), Sejong 339-700, Korea; E-mail: [dwcho@korea.ac.kr](mailto:dwcho@korea.ac.kr)

<sup>b</sup> Institute of Scientific and Industrial Research (SANKEN), Osaka University, Mihogaoka 8-1, Ibaraki, Osaka 567-0047, Japan, E-mail: [majima@saken.osaka-u.ac.jp](mailto:majima@saken.osaka-u.ac.jp)

<sup>c</sup> Department of Chemistry, Pusan National University, Busan 609-735, Korea [ucyoon@pusan.ac.kr](mailto:ucyoon@pusan.ac.kr)

<sup>d</sup> Department of Chemistry, Yeungnam University, Gyeongsan, Gyeongbuk 712-749, Korea [dwcho00@yu.ac.kr](mailto:dwcho00@yu.ac.kr)

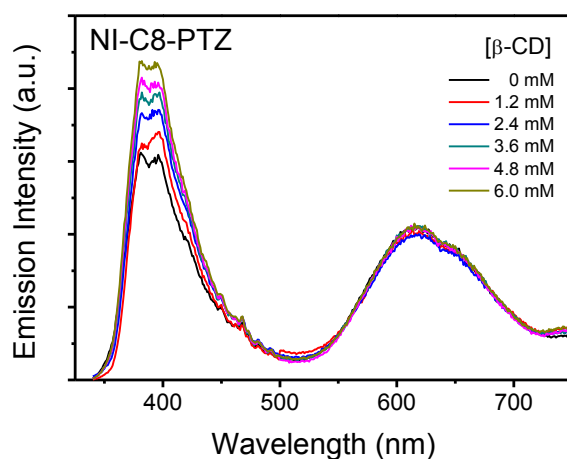

**Fig. S1.** Fluorescence spectra of NI-C8-PTZ ( $2.2 \times 10^{-5}$  M) in  $\beta$ -CD ( $\text{CH}_3\text{CN}/\text{H}_2\text{O}$ ;  $v/v=1:9$ ) solutions. The excitation wavelength was 330 nm.

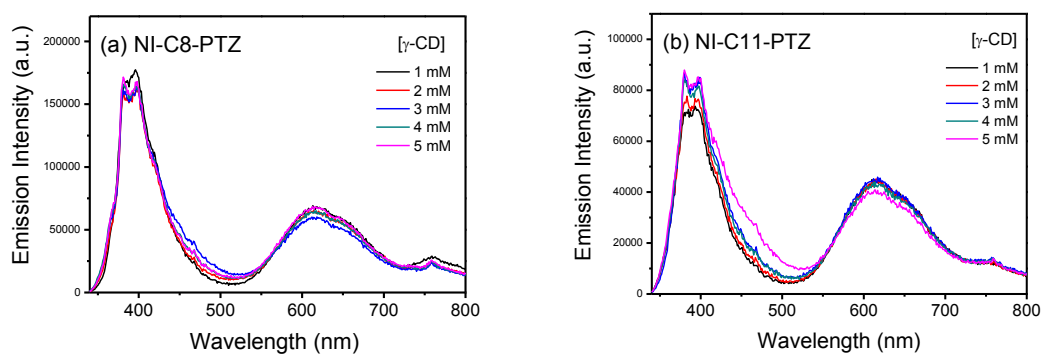

**Fig. S2.** a) Fluorescence spectra of NI-C8-PTZ and NI-C11-PTZ ( $2.2 \times 10^{-5}$  M) in  $\gamma$ -CD ( $\text{CH}_3\text{CN}/\text{H}_2\text{O}$ ;  $v/v=1:9$ ) solutions. The excitation wavelength was 330 nm.
